# Supplementary material for: Lipid nanoparticle composition for adjuvant formulation modulates disease after influenza virus infection in quadrivalent influenza vaccine vaccinated mice
Source: PubMed Central journal article supplement (PMC11070541; doi:10.3389/fimmu.2024.1370564), 2024-04-22
Supplement: Table_1.pdf [file Table_1.pdf]

**Supplementary table:** List of reagents and kits used in the study.

| <b>Reagent</b>                                        | <b>Brand</b>      | <b>Catalogue number</b> |
|-------------------------------------------------------|-------------------|-------------------------|
| DMEM                                                  | Corning           | 10013-CV                |
| RPMI 1640                                             | Gibco             | 22400089                |
| Penicillin/streptomycin                               | Corning           | 30002-CI                |
| Goat HRP-conjugated secondary Anti-mouse IgG antibody | Abcam             | Ab6823                  |
| Anti-mouse IgG1-HRP secondary antibody                | Invitrogen        | PA174421                |
| Anti-mouse IgG2a-HRP secondary antibody               | Invitrogen        | A10685                  |
| TMB substrate                                         | BD OptEIA         | 555214                  |
| KPL true blue substrate                               | Sera care         | 5510-0050               |
| 70µm strainer                                         | BD                | 352340                  |
| Peptivator H1-HA peptide                              | MiltenyiBiotech   | 130-099-803             |
| Oxoid agar                                            | Thermofisher      | LP0028B                 |
| EMEM                                                  | BioWhittaker      | 12684F                  |
| Receptor-destroying enzyme (RDE)                      | Hardy diagnostics | 370013                  |
| TPCK                                                  | Sigma             | T4376                   |
| 10% methanol-free formaldehyde                        | Polysciences      | 040181                  |
| 2M Sulfuric acid                                      | Thermo fisher     | S25898                  |
| Mouse IFN-γ ELISPOT kit                               | RnD systems       | EL485                   |
| Mouse IL-4 ELISPOT kit                                | RnD systems       | EL404                   |
| ELISA NUNC-maxisorp plates                            | Invitrogen        | 44240421                |
| Th1/Th2 Cytokine 11-Plex Mouse ProcartaPlex™ Panel    | Invitrogen        | EPX110-20820-901        |
